# Supplementary material for: SARS-CoV-2 infection in acute pancreatitis increases disease severity and 30-day mortality: COVID PAN collaborative study
Source: HighWire-hosted journal article supplement (doi:10.1136/gutjnl-2020-323364), 2021-02-05
Supplement: gutjnl-2020-323364supp002_data_supplement.pdf [file gutjnl-2020-323364supp002_data_supplement.pdf]

### Supplementary file 2 : Comparison of outcomes between confirmed SARS-CoV-2 Positive and Negative patients using imputed datasets

| Outcome                     | COVID status | Unadjusted Analysis (**) |                   |         | Adjusted Analysis (~) (***) |                   |         |
|-----------------------------|--------------|--------------------------|-------------------|---------|-----------------------------|-------------------|---------|
|                             |              | N                        | OR (95% CI)       | P-value | N                           | OR (95% CI)       | P-value |
| ICU admission               | Negative     | 1628                     | 1                 | <0.001  | 1628                        | 1                 | 0.11    |
|                             | Positive     | 149                      | 3.63 (2.23, 5.90) |         | 149                         | 1.76 (0.89, 3.50) |         |
| 30-day mortality            | Negative     | 1628                     | 1                 | <0.001  | 1628                        | 1                 | 0.02    |
|                             | Positive     | 149                      | 4.94 (2.70, 9.03) |         | 149                         | 2.59 (1.17, 5.74) |         |
| Length of hospital stay (*) | Negative     | 1628                     | 1                 | <0.001  | 1628                        | 1                 | <0.001  |
|                             | Positive     | 149                      | 1.76 (1.54, 2.00) |         | 149                         | 1.27 (1.12, 1.43) |         |
| Necrosis (suspected or +ve) | Negative     | 1628                     | 1                 | <0.001  | 1628                        | 1                 | 0.49    |
|                             | Positive     | 149                      | 2.31 (1.46, 3.63) |         | 149                         | 0.80 (0.43, 1.49) |         |
| Any local complication (#)  | Negative     | 1628                     | 1                 | <0.001  | 1628                        | 1                 | 0.15    |
|                             | Positive     | 149                      | 2.65 (1.83, 3.84) |         | 149                         | 1.41 (0.89, 2.24) |         |
| Persistent organ failure    | Negative     | 1628                     | 1                 | <0.001  | 1628                        | 1                 | <0.001  |
|                             | Positive     | 149                      | 6.26 (4.01, 9.80) |         | 149                         | 3.38 (1.81, 6.29) |         |

(~) Adjusted for: age, sex, smoking status, alcohol aetiology, idiopathic aetiology, unknown aetiology, other aetiology, ECOG, Atlanta classification.

(\*) Summary statistics are: Median [Inter-quartile range]. Group differences reported as: Ratio (95% CI)

(#) Defined as any of: Collection, Pseudoaneurysm, Pancreatic Pleural Fistula, Enteric Fistula, Pancreatic Ascites, or Portal Vein Thrombus

(\*\*) (\*\*\*) The data analysis included 1628 patients in the SARS-CoV-2 positive group and 149 patients in the negative group
