# Supplementary material for: SARS-CoV-2 infection in acute pancreatitis increases disease severity and 30-day mortality: COVID PAN collaborative study
Source: HighWire-hosted journal article supplement (doi:10.1136/gutjnl-2020-323364), 2021-02-05
Supplement: gutjnl-2020-323364supp003_data_supplement.pdf [file gutjnl-2020-323364supp003_data_supplement.pdf]

## Supplementary file 3 – List of participating units

| Specialist pancreatic centres                                | Number of patients | Non Specialist Pancreatic Centres                         | Number of patients |
|--------------------------------------------------------------|--------------------|-----------------------------------------------------------|--------------------|
| University Birmingham Hospitals                              | 34                 | Brighton and Sussex University Hospitals NHS Trust        | 15                 |
| University Hospitals Bristol and Weston NHS Foundation Trust | 30                 | Chesterfield Royal Hospital                               | 13                 |
| Addenbrookes, Cambridge University Hospitals                 | 29                 | University Hospitals of Derby and Burton                  | 59                 |
| Coventry and Warwickshire Partnership NHS trust              | 45                 | Doncaster Royal Infirmary                                 | 53                 |
| Edinburgh Royal Infirmary                                    | 71                 | NHS Dumfries and Galloway                                 | 31                 |
| Greater Glasgow and Clyde NHS Trust                          | 55                 | NHS Forth Valley                                          | 34                 |
| Klaipeda University Hospital, Lithuania                      | 18                 | Frimley - Frimley Park NHS Foundation Trust               | 7                  |
| Leeds Teaching Hospitals NHS Trust                           | 73                 | Frimley - Wexham Park NHS Foundation Trust                | 36                 |
| Aintree University Hospital                                  | 65                 | Gloucestershire Hospitals NHS Foundation Trust            | 54                 |
| Royal Liverpool and Broadgreen NHS Foundation Trust          | 26                 | Good Hope Hospital Birmingham                             | 38                 |
| Mater Dei Hospital, Malta                                    | 23                 | Aberdeen Royal Infirmary                                  | 9                  |
| Manchester Royal Infirmary                                   | 28                 | Heartlands Hospital, Birmingham                           | 29                 |
| Newcastle upon Tyne Hospitals NHS Foundation Trust           | 82                 | Lewisham and Greenwich NHS Trust                          | 47                 |
| Nottingham University Hospitals                              | 61                 | North Bristol NHS Trust                                   | 81                 |
| University Hospitals Plymouth NHS Foundation Trust           | 25                 | Northampton General Hospital                              | 40                 |
| Royal Surrey County Hospital NHS Trust                       | 23                 | Princess Alexandra Hospital                               | 33                 |
| Sapienza University Hospitals Rome                           | 21                 | Royal Gwent Hospital                                      | 28                 |
| Sheffield Teaching Hospital                                  | 65                 | South Tees Hospitals NHS Foundation Trust                 | 34                 |
| University Hospitals Southampton NHS Foundation Trust        | 50                 | South Warwickshire NHS Foundation Trust                   | 4                  |
| Swansea Bay University Health Board                          | 44                 | Surrey and Sussex Healthcare NHS Trust                    | 69                 |
| Ziauddin Hospital, Pakistan                                  | 10                 | Taunton and Somerset NHS Foundation Trust                 | 32                 |
| Cardiff University Hospital of Wales                         | 37                 | Tepecik Teaching and Research Hospital                    | 12                 |
| Guy's and St Thomas NHS Foundation Trust                     | 5                  | Western Health and Social Care Trust                      | 16                 |
|                                                              |                    | Weston General Hospital                                   | 15                 |
|                                                              |                    | Whittington Health NHS Trust                              | 8                  |
|                                                              |                    | Wirral University Teaching Hospitals NHS Foundation Trust | 34                 |
|                                                              |                    | Wrightington, Wigan and Leigh NHS Foundation Trust        | 26                 |
