# Supplementary material for: SARS-CoV-2 infection in acute pancreatitis increases disease severity and 30-day mortality: COVID PAN collaborative study
Source: HighWire-hosted journal article supplement (doi:10.1136/gutjnl-2020-323364), 2021-02-05
Supplement: gutjnl-2020-323364supp004_data_supplement.pdf [file gutjnl-2020-323364supp004_data_supplement.pdf]

Supplementary file 4: Comparison of outcomes between SARS-CoV-2 Positive and Negative patients  
comparing specialist vs. non specialist pancreatic centres

| Outcome                            | Centre         | COVID status | Unadjusted Analysis (**) |           |        |                      |        | Adjusted Analysis (*) (***) |             |        |
|------------------------------------|----------------|--------------|--------------------------|-----------|--------|----------------------|--------|-----------------------------|-------------|--------|
|                                    |                |              | N                        | %         | Int P. | OR (95% CI)          | P      | Int. P                      | OR (95% CI) |        |
| ICU admission                      | Non-specialist | Negative     | 753                      | 4.4%      | 0.18   | 1                    | <0.001 | 0.81                        | 1           | 0.14   |
|                                    |                | Positive     | 68                       | 23.5%     |        | 7.19<br>(3.58, 14.4) |        |                             |             |        |
|                                    | Specialist     | Negative     | 614                      | 10.9%     |        | 1                    | 0.002  | 0.78                        | 1           | 0.33   |
|                                    |                | Positive     | 42                       | 26.2%     |        | 3.52<br>(1.60, 7.76) |        |                             |             |        |
| 30-day mortality                   | Non-specialist | Negative     | 728                      | 2.3%      | 0.47   | 1                    | <0.001 | 0.78                        | 1           | 0.07   |
|                                    |                | Positive     | 62                       | 16.1%     |        | 8.04<br>(3.51, 18.4) |        |                             |             |        |
|                                    | Specialist     | Negative     | 600                      | 2.8%      |        | 1                    | 0.003  | 0.78                        | 1           | 0.30   |
|                                    |                | Positive     | 40                       | 12.5%     |        | 4.90<br>(1.71, 14.0) |        |                             |             |        |
| Length of hospital stay (*)        | Non-specialist | Negative     | 736                      | 4 [3, 7]  | 0.21   | 1                    | <0.001 | 0.36                        | 1           | <0.001 |
|                                    |                | Positive     | 63                       | 9 [5, 17] |        | 2.04<br>(1.70, 2.45) |        |                             |             |        |
|                                    | Specialist     | Negative     | 605                      | 5 [3, 8]  |        | 1                    | <0.001 | 0.36                        | 1           | 0.05   |
|                                    |                | Positive     | 38                       | 11 [5,20] |        | 1.69<br>(1.34, 2.13) |        |                             |             |        |
| Pancreatic Necrosis                | Non-specialist | Negative     | 623                      | 9.6%      | 0.76   | 1                    | 0.007  | 0.93                        | 1           | 0.59   |
|                                    |                | Positive     | 62                       | 21.0%     |        | 2.54<br>(1.29, 4.99) |        |                             |             |        |
|                                    | Specialist     | Negative     | 565                      | 15.0%     |        | 1                    | 0.04   | 0.93                        | 1           | 0.76   |
|                                    |                | Positive     | 41                       | 26.8%     |        | 2.16<br>(1.03, 4.55) |        |                             |             |        |
| Acute Pancreatic Fluid Collections | Non-specialist | Negative     | 622                      | 19.3%     | 0.31   | 1                    | <0.001 | 0.43                        | 1           | 0.04   |
|                                    |                | Positive     | 62                       | 46.8%     |        | 4.05<br>(2.29, 7.16) |        |                             |             |        |
|                                    | Specialist     | Negative     | 568                      | 23.4%     |        | 1                    | 0.007  | 0.43                        | 1           | 0.50   |

|                                   |                |          |     |       |      |                         |        |                         |                         |      |
|-----------------------------------|----------------|----------|-----|-------|------|-------------------------|--------|-------------------------|-------------------------|------|
|                                   |                | Positive | 41  | 43.9% |      | 2.56<br>(1.30,<br>5.05) |        | 1.33<br>(0.59,<br>3.02) |                         |      |
| Any local complication<br><br>(#) | Non-specialist | Negative | 613 | 24.3% | 0.19 | 1                       | <0.001 | 0.27                    | 1                       | 0.10 |
|                                   |                | Positive | 60  | 53.3% |      | 3.74<br>(2.12,<br>6.57) |        |                         |                         |      |
|                                   | Specialist     | Negative | 567 | 28.0% |      | 1                       | 0.04   | 1                       | 0.95<br>(0.39,<br>2.30) | 0.91 |
|                                   |                | Positive | 41  | 43.9% |      | 2.06<br>(1.05,<br>4.05) |        |                         |                         |      |
| Persistent organ failure          | Non-specialist | Negative | 764 | 6.2%  | 0.64 | 1                       | <0.001 | 0.45                    | 1                       | 0.07 |
|                                   |                | Positive | 60  | 35.0% |      | 8.10<br>(4.28,<br>15.3) |        |                         |                         |      |
|                                   | Specialist     | Negative | 574 | 4.5%  |      | 1                       | <0.001 | 1                       | 3.60<br>(1.35,<br>9.62) | 0.01 |
|                                   |                | Positive | 84  | 19.1% |      | 6.41<br>(3.06,<br>13.4) |        |                         |                         |      |

(~) Adjusted for: age, sex, smoking status, alcohol aetiology, idiopathic aetiology, unknown aetiology, other aetiology, ECOG, Atlanta classification, necrosectomy and cholecystectomy

(\*) Summary statistics are: Median [p75-p25]. Group differences reported as: Ratio (95% CI)

(~) Adjusted for: age, sex, smoking status, alcohol aetiology, idiopathic aetiology, unknown aetiology, other aetiology, ECOG, Atlanta classification, necrosectomy and cholecystectomy

(#) Defined as any of: Collection, Pseudoaneurysm, Pancreatic Pleural Fistula, Enteric Fistula, Pancreatic Ascites, or Portal Vein Thrombus

(~) Adjusted for: age, sex, smoking status, alcohol aetiology, idiopathic aetiology, unknown aetiology, other aetiology, ECOG, Atlanta classification

**(\*\*) (\*\*\*) 920 patients were managed in specialist centers and 857 patients in non-specialist centers**
