# Supplementary material for: SARS-CoV-2 infection in acute pancreatitis increases disease severity and 30-day mortality: COVID PAN collaborative study
Source: HighWire-hosted journal article supplement (doi:10.1136/gutjnl-2020-323364), 2021-02-05
Supplement: gutjnl-2020-323364supp005_data_supplement.pdf [file gutjnl-2020-323364supp005_data_supplement.pdf]

**Supplementary file 5 : Comparison of outcomes between swab confirmed SARS-CoV-2 Positive and Negative patients**

| Outcome                                               | COVID status | Unadjusted Analysis |             |                   |         | Adjusted Analysis <sup>(*)</sup> |                   |         |
|-------------------------------------------------------|--------------|---------------------|-------------|-------------------|---------|----------------------------------|-------------------|---------|
|                                                       |              | N                   | n (%)       | OR (95% CI)       | P-value | N                                | OR (95% CI)       | P-value |
| ICU admission                                         | Negative     | 822                 | 82 (10.0%)  | 1                 | <0.001  | 822                              | 1                 | 0.47    |
|                                                       | Positive     | 82                  | 19 (23.2%)  | 3.16 (1.66, 5.98) |         | 82                               | 1.38 (0.58, 3.30) |         |
| 30-day mortality                                      | Negative     | 789                 | 27 (3.4%)   | 1                 | <0.001  | 789                              | 1                 | 0.04    |
|                                                       | Positive     | 74                  | 12 (16.2%)  | 5.46 (2.64, 11.3) |         | 74                               | 2.65 (1.03, 6.83) |         |
| Length of hospital stay <sup>(*)</sup>                | Negative     | 802                 | 5 [3, 9]    | 1                 | <0.001  | 802                              | 1                 | 0.02    |
|                                                       | Positive     | 74                  | 8 [4, 17]   | 1.60 (1.34, 1.90) |         | 74                               | 1.20 (1.03, 1.40) |         |
| Pancreatic Necrosis (suspected or +ve)                | Negative     | 727                 | 104 (14.3%) | 1                 | 0.02    | 727                              | 1                 | 0.88    |
|                                                       | Positive     | 76                  | 19 (25.0%)  | 2.06 (1.13, 3.73) |         | 76                               | 0.94 (0.46, 1.95) |         |
| Acute pancreatic fluid Collections (suspected or +ve) | Negative     | 725                 | 169 (23.3%) | 1                 | <0.001  | 725                              | 1                 | 0.02    |
|                                                       | Positive     | 76                  | 36 (47.4%)  | 3.11 (1.84, 5.24) |         | 76                               | 2.14 (1.16, 3.96) |         |
| Pseudo aneurysms (suspected or +ve)                   | Negative     | 725                 | 12 (1.5%)   | 1                 | 0.89    | 725                              | 1                 | 0.34    |
|                                                       | Positive     | 76                  | 1 (1.3%)    | 0.87 (0.11, 6.80) |         | 76                               | 0.33 (0.03, 3.24) |         |
| PL fistula (suspected or +ve)                         | Negative     | 725                 | 4 (0.8%)    |                   | (+)     | 725                              |                   | (+)     |
|                                                       | Positive     | 75                  | 0 (0.0%)    |                   |         | 75                               |                   |         |
| Enteric fistula (suspected or +ve)                    | Negative     | 724                 | 8 (1.1%)    |                   | (+)     | 725                              |                   | (+)     |
|                                                       | Positive     | 102                 | 0 (0.0%)    |                   |         | 75                               |                   |         |
| Pancreatic ascites (suspected or +ve)                 | Negative     | 726                 | 79 (10.9%)  | 1                 | 0.58    | 726                              | 1                 | 0.64    |
|                                                       | Positive     | 76                  | 10 (13.2%)  | 1.25 (0.57, 2.71) |         | 76                               | 0.81 (0.33, 1.97) |         |
| Portal vein thrombus (suspected or +ve)               | Negative     | 722                 | 28 (3.9%)   | 1                 | 0.80    | 722                              | 1                 | 0.19    |
|                                                       | Positive     | 75                  | 2 (2.7%)    | 0.82 (0.18, 3.70) |         | 75                               | 0.33 (0.06, 1.73) |         |
| Any local                                             | Negative     | 722                 | 219 (30.3%) | 1                 | <0.001  | 722                              | 1                 | 0.11    |

|                  |          |     |               |                      |        |     |                      |       |
|------------------|----------|-----|---------------|----------------------|--------|-----|----------------------|-------|
| complication (#) | Positive | 75  | 39<br>(52.0%) | 2.55 (1.53,<br>4.24) |        | 75  | 1.65 (0.89,<br>3.08) |       |
|                  | Negative | 798 | 55<br>(6.9%)  | 1                    | <0.001 | 798 | 1                    | 0.004 |
|                  | Positive | 111 | 27<br>(24.3%) | 5.48 (3.03,<br>9.92) |        | 111 | 3.42 (1.47,<br>7.94) |       |

(~) Adjusted for: age, sex, smoking status, alcohol aetiology, idiopathic aetiology, unknown aetiology, other aetiology, ECOG, Atlanta classification

(\*) Summary statistics are: Median [**p75-p25**]. Group differences reported as: Ratio (95% CI)

(+) Insufficient occurrences to enable a formal group comparison

(#) Defined as any of: Collection, Pseudoaneurysm, Pancreatic Pleural Fistula, Enteric Fistula, Pancreatic Ascites, or Portal Vein Thrombus

**(\*\*) (\*\*\*) 983 patients were included in the SARS-CoV-2 negative group and 118 patients in the negative group**
