# Supplementary material for: SARS-CoV-2 infection in acute pancreatitis increases disease severity and 30-day mortality: COVID PAN collaborative study
Source: HighWire-hosted journal article supplement (doi:10.1136/gutjnl-2020-323364), 2021-02-05
Supplement: gutjnl-2020-323364supp006_data_supplement.pdf [file gutjnl-2020-323364supp006_data_supplement.pdf]

Supplementary file 6: Comparison of outcomes between unconfirmed SARS-CoV-2 Positive and Negative patients

| Outcome                                | COVID status | Unadjusted Analysis (**) |            |                   |                  | Adjusted Analysis <sup>(~)</sup> (***) |                   |                  |
|----------------------------------------|--------------|--------------------------|------------|-------------------|------------------|----------------------------------------|-------------------|------------------|
|                                        |              | N                        | n (%)      | OR (95% CI)       | P-value          | N                                      | OR (95% CI)       | P-value          |
| ICU admission                          | Negative     | 545                      | 82 (3.3%)  | 1                 | <b>&lt;0.001</b> | 545                                    | 1                 | 0.05             |
|                                        | Positive     | 28                       | 8 (28.6%)  | 33.7 (6.98, 163)  |                  | 28                                     | 15.6 (0.96, 252)  |                  |
| 30-day mortality                       | Negative     | 539                      | 7 (1.3%)   | 1                 | <b>0.01</b>      | 539                                    | 1                 | 0.38             |
|                                        | Positive     | 28                       | 3 (10.7%)  | 15.6 (1.88, 130)  |                  | 28                                     | 3.13 (0.25, 39.1) |                  |
| Length of hospital stay <sup>(*)</sup> | Negative     | 539                      | 4 [2, 7]   | 1                 | <b>&lt;0.001</b> | 539                                    | 1                 | <b>&lt;0.001</b> |
|                                        | Positive     | 27                       | 13 [6, 19] | 2.51 (1.94, 3.25) |                  | 27                                     | 1.71 (1.33, 2.20) |                  |
| Necrosis (suspected or +ve)            | Negative     | 461                      | 41 (8.9%)  | 1                 | 0.11             | 461                                    | 1                 | 0.15             |
|                                        | Positive     | 27                       | 5 (18.5%)  | 2.35 (0.83, 6.67) |                  | 27                                     | 0.38 (0.10, 1.42) |                  |
| Collections (suspected or +ve)         | Negative     | 465                      | 84 (18.1%) | 1                 | <b>0.007</b>     | 465                                    | 1                 | 0.85             |
|                                        | Positive     | 27                       | 11 (40.7%) | 3.47 (1.41, 8.51) |                  | 27                                     | 0.90 (0.31, 2.67) |                  |
| Pseudo aneurysms (suspected or +ve)    | Negative     | 460                      | 1 (0.2%)   |                   | (+) (+)          | 460                                    |                   | (+) (+)          |
|                                        | Positive     | 76                       | 0 (0.0%)   |                   |                  | 27                                     |                   |                  |
| PL fistula (suspected or +ve)          | Negative     | 463                      | 6 (1.3%)   |                   | (+) (+)          | 463                                    |                   | (+) (+)          |
|                                        | Positive     | 27                       | 0 (0.0%)   |                   |                  | 27                                     |                   |                  |
| Enteric fistula (suspected or +ve)     | Negative     | 461                      | 1 (0.2%)   |                   | (+) (+)          | 461                                    |                   | (+) (+)          |
|                                        | Positive     | 27                       | 2 (7.4%)   |                   |                  | 27                                     |                   |                  |
| Pancreatic ascites (suspected or +ve)  | Negative     | 461                      | 7 (1.5%)   | 1                 | <b>&lt;0.001</b> | 461                                    |                   | (+) (+)          |
|                                        | Positive     | 27                       | 5 (18.5%)  | 15.3 (3.32, 70.5) |                  | 27                                     |                   |                  |

|                                         |          |     |             |                   |                  |     |                   |      |
|-----------------------------------------|----------|-----|-------------|-------------------|------------------|-----|-------------------|------|
| Portal vein thrombus (suspected or +ve) | Negative | 458 | 28 (1.5%)   | 1                 | 0.39             | 458 | 1                 | 0.47 |
|                                         | Positive | 26  | 1 (3.9%)    | 2.57 (0.30, 21.8) |                  | 26  | 0.38 (0.03, 5.27) |      |
| Any local complication (#)              | Negative | 458 | 219 (19.4%) | 1                 | <b>0.01</b>      | 458 | 1                 | 0.83 |
|                                         | Positive | 26  | 11 (42.3%)  | 3.31 (1.32, 8.28) |                  | 26  | 1.13 (0.38, 3.41) |      |
| Persistent organ failure                | Negative | 540 | 18 (3.3%)   | 1                 | <b>&lt;0.001</b> | 540 | 1                 | 0.79 |
|                                         | Positive | 33  | 10 (30.3%)  | 11.7 (4.13, 33.0) |                  | 33  | 1.23 (0.27, 5.64) |      |

(~) Adjusted for: age, sex, smoking status, alcohol aetiology, idiopathic aetiology, unknown aetiology, other aetiology, ECOG, Atlanta classification

(\*) Summary statistics are: Median [p25-p75]. Group differences reported as: Ratio (95% CI)

(+) Insufficient occurrences to enable a formal group comparison

(#) Defined as any of: Collection, Pseudoaneurysm, Pancreatic Pleural Fistula, Enteric Fistula, Pancreatic Ascites, or Portal Vein Thrombus

**(\*\*) (\*\*\*) 646 of the 1,628 negative patients (39.2%) were compared with 31 of the 149 positive patients (20.8%) had unconfirmed positive status based on the WHO classification.**
